# Supplementary material for: Antioxidant, Anti-Obesity, and Anti-Aging Activities of Jeju Citrus Blended Vinegar
Source: MDPI journal article supplement (doi:10.3390/foods10071441), 2021-06-22
Supplement: s1 [file s1]

**Table S1.** Primer sequences used in quantitative real-time PCR

| Gene           | Forward primer (5'-3') | Reverse primer (5'-3') |
|----------------|------------------------|------------------------|
| <b>Mouse</b>   |                        |                        |
| GAPDH          | GTATGACTCCACTCACGGCAAA | GGTGTGGCTCCTGGAAGATG   |
| aP2            | CATGGCCAAGCCCAACAT     | CGCCCAGTTTGAAGGAAATC   |
| C/EBP $\alpha$ | AGGTGCTGGAGTTGACCAGT   | CAGCCTAGAGATCCAGCGAC   |
| PPAR $\gamma$  | CGCTGATGCACTGCCTATGA   | AGAGGTCCACAGAGCTGATTCC |
| SREBP-1c       | AGAGGGTGAGCCTGACAA     | CCTCTGCAATTTCCAGAT     |
| FAS            | CTGAGATCCCAGCACTTCTTGA | GCCTCCGAAGCCAAATGAG    |
| <b>Human</b>   |                        |                        |
| $\beta$ -actin | CCACCATGTACCCTGGCATT   | CGGACTCGTCATACTCCTGC   |
| p21            | TTCTCCACCTAGACTGTAA    | GCACCTGCTGTATATTCA     |
| p53            | GTGTGGAGTATTTGGATGAC   | ATGTAGTTGTAGTGGATGGT   |
| c-Fos          | TCACCCGCAGACTCCTTCTC   | GTGGGAATGAAGTTGGCACTG  |
